# Supplementary material
Source: publisher site journal article supplement (https://www.dovepress.com/article/256450)

**Figure S1 Survival estimation of SAP model.**

**Figure S2 Identification of CMCs.**

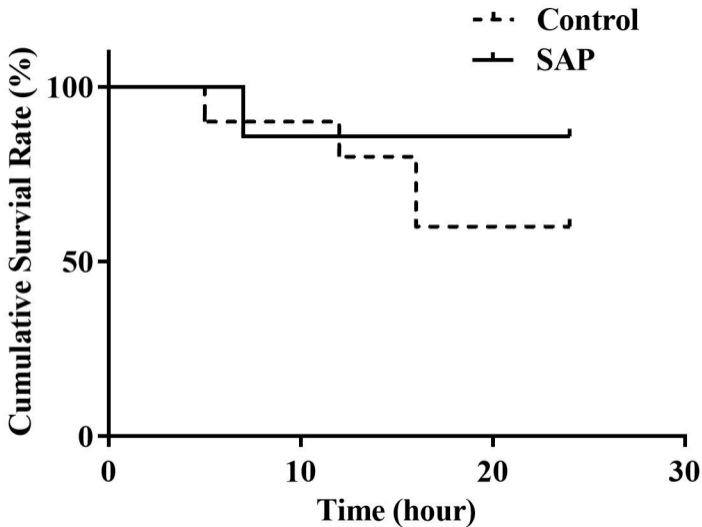

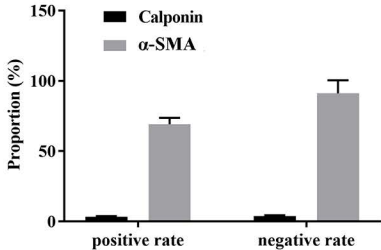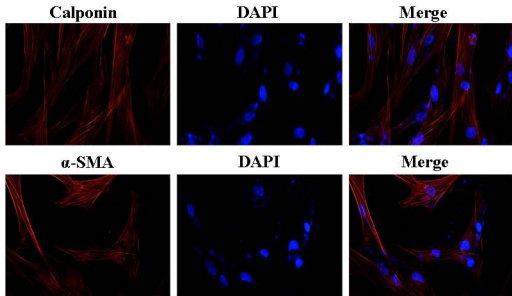

Supplement: Supplementary file 1 [file get_supplementary_file.php]
